# Supplementary material
Source: Elsevier journal article supplement (https://www.sciencedirect.com/science/article/pii/S2341287915001908)
Supplement: mmc1 [file S2341287915001908:mmc1.pdf]

## CUESTIONARIO SOBRE FORMACIÓN EN LACTANCIA

Escribe los últimos 3 números y letra de tu DNI (para identificar el test con anonimato):

|  |  |  |  |
|--|--|--|--|
|  |  |  |  |
|--|--|--|--|

Categoría profesional:

☐ Adjunto ☐ Residente (☐ R1, ☐ R2, ☐ R3, ☐ R4) ☐ Otro \_\_\_\_\_

Especialidad: \_\_\_\_\_

Hospital o Centro de trabajo: \_\_\_\_\_

Edad: \_\_\_\_\_ Sexo: \_\_\_\_\_ N° de hijos: \_\_\_\_\_

¿Experiencia personal de lactancia (o de la pareja)? ☐ Sí ☐ No

Duración global de la lactancia (meses): \_\_\_\_\_

### GRACIAS POR TU PARTICIPACIÓN

Se trata de un cuestionario anónimo para evaluar la formación en lactancia.

NO ES UN EXAMEN

Por favor, contesta sin consultar las respuestas e intenta no dejar preguntas en blanco.

## CUESTIONARIO SOBRE FORMACIÓN EN LACTANCIA MATERNA

1. En caso de mastitis se debe suspender la lactancia de forma temporal. V/F
  2. Se debe recomendar que las tomas sean de 15 minutos en cada pecho cada 2-3 horas. V/F
  3. La alimentación exclusiva a base de leche de fórmula conlleva un riesgo incrementado de morbimortalidad. V/F
  4. La mayoría de bebés nacidos por cesárea necesitan suplementación con fórmula las primeras horas de vida. V/F
  5. En el caso de que un lactante amamantado tenga problemas con la lactancia y precise un suplemento (de leche materna o artificial), se desaconseja por regla general administrarlo con biberón, especialmente en las primeras semanas de vida. V/F
  6. En un recién nacido amamantado: una frecuencia elevada de tomas disminuye el riesgo de precisar fototerapia. V/F
  7. En un recién nacido sano, antes de la primera toma de pecho en paritorio se le debe pesar, comprobar el test de Apgar en una cuna con calor radiante y realizar una correcta profilaxis oculoheorrágica. V/F
  8. En grandes prematuros (<32 sem) es de elección la leche materna (fortificada cuando lo precise), siendo la segunda mejor opción la leche humana de banco; y dejando la suplementación con fórmula especial para prematuros sólo como última alternativa. V/F
  9. En la Maternidad, un recién nacido de más de 15 horas de vida al que hay que despertar para mamar en todas las tomas es un lactante de riesgo. V/F
  10. A partir de los 12 meses el contenido en nutrientes de la leche materna disminuye significativamente con respecto al primer año de lactancia. V/F
  11. Si un niño amamantado, con buen estado general, presenta como único hallazgo una escasa ganancia de peso, el primer paso es suplementar las tomas con leche de fórmula y revalorar. V/F
  12. A partir de los 6 meses, las tomas deben reducirse a 2-3 al día, complementadas con el resto de alimentos. V/F
  13. La “leche aguada” es en realidad la leche de la primera parte de la toma. V/F
  14. El siguiente dibujo muestra un enganche eficaz. V/F
- 
15. ¿Cuáles son las recomendaciones actuales de la OMS sobre lactancia?
    - a) Lactancia materna exclusiva (LME) hasta los 4 meses de edad, complementada con otros alimentos hasta que deseen madre e hijo.
    - b) LME hasta los 6 meses de edad, pudiendo mantener la lactancia, complementada con otros alimentos, hasta un máximo de 2 años.
    - c) LME hasta los 6 meses y posteriormente complementada con otros alimentos hasta los 2 años o más, según deseen madre e hijo.
  16. ¿Cuál de las siguientes actuaciones es la más importante a realizar en una madre lactante que tiene grietas en los pezones?
    - a) Lavado con agua y jabón
    - b) Aplicación de lanolina pura después de cada toma
    - c) Valoración de la toma
    - d) Recomendar el uso de pezoneras
  17. Unos padres traen a su bebé de 17 días a la urgencia por llanto. Sólo toma pecho y hasta ahora todo iba bien, pero refieren que desde hace 24 horas llora y pide pecho muy a menudo, a veces cada 30-60 minutos. En el pecho se calma y succiona vigorosamente. El niño no tiene apariencia de enfermedad, la ganancia ponderal es buena y la exploración es normal, pero la madre tiene la sensación de que se queda con hambre. ¿Qué diagnóstico y tratamiento harías?
    - a) Hipogalactia. Suplementaría las tomas con 60 ml de fórmula y control con su pediatra.
    - b) Brote de crecimiento. Observaría la toma, recomendaría tomas a demanda y controles habituales por su pediatra.
    - c) Hipogalactia. Recomendaría pesar antes y después de la toma y suplementar con fórmula para completar en cada toma la cantidad necesaria para 150 ml/kg/día repartidos en 8 tomas.
    - d) Cólicos del lactante. Recomendaría masajes abdominales y balancear al niño en decúbito prono hasta que le toque la siguiente toma.
  18. Enumera 5 características de un enganche eficaz que podrías utilizar para evaluar una toma:

[no se darán por válidas respuestas amplias o ambiguas (p.ej: “labios” o “postura labios”), se pide ser concreto aunque en 2 o 3 palabras]

- a) \_\_\_\_\_
- b) \_\_\_\_\_
- c) \_\_\_\_\_
- d) \_\_\_\_\_
- e) \_\_\_\_\_

**19. ¿Qué le dirías a una mujer embarazada que te comenta en la consulta que se está planteando la lactancia artificial?**

- a) Nada, puesto que se trata de una opción personal y la respetaría
- b) Le pediría que me hablara más sobre el tema para conocer sus razones e información y desde el respeto valoraría animarle a replantearlo
- c) Que dada la absoluta superioridad de la leche materna, es una irresponsabilidad no amamantar cuando no hay contraindicaciones.
- d) Que no se sienta culpable, porque la mayoría de niños se crían igual de bien con pecho que con biberón.
- e) Todas las anteriores son correctas.

**20. Acerca de que se proporcionen muestras gratuitas de leche de inicio a las madres, en centros sanitarios:**

- a) Es una violación del Código Internacional de Comercialización de Sucedáneos de la Leche Materna.
- b) Es aceptable como apoyo parcial si la familia es de bajos recursos.
- c) Es aceptable si ponen claramente que la leche materna es el mejor alimento para el lactante.
- d) Es adecuado para ayudar a madres con dificultades en su lactancia.
- e) Todas las anteriores son correctas

**21. Una madre lactante consulta porque va a comenzar tratamiento con adalimumab por una enfermedad de Crohn. Su digestólogo le ha dicho que debe destetar a su bebé de 8 meses porque el tratamiento es importante. ¿Dónde podrías consultar si el fármaco es compatible o no con la lactancia?**

- a) En la ficha técnica del medicamento
- b) Me remitiría a la información del médico especialista que lo haya prescrito.
- c) En el Medimecum
- d) No es necesario consultarlo. Valorando riesgos y beneficios lo más adecuado es el destete, puesto que el niño tiene ya 8 meses.
- e) En una página web que conozco. Especificar: \_\_\_\_\_

**22. Eres el médico y estás en la Maternidad. Una enfermera está preocupada por la lactancia de un recién nacido, cree que algo no va bien y quiere que vayas a observar una toma.**

- a) Creo que nunca lo he hecho y no sabría exactamente qué observar.
- b) He observado alguna toma durante mi residencia, pero no tengo mucha experiencia. Creo que diagnosticaría solamente problemas muy evidentes.
- c) No me siento seguro. Me fijaría más en cuánto peso ha perdido y en la glucemia. En caso de duda, recomendaría un suplemento para evitar la pérdida de peso.
- d) He observado tomas numerosas veces y me vería capaz de diagnosticar y ofrecer soluciones a los problemas más habituales.

**23. ¿Consideras apropiado que una mujer dé de mamar en público? Sí / No**

**24. Valora de 1 a 5 la calidad de la formación recibida sobre lactancia materna durante los años de residencia:**

|                   |            |         |               |                      |
|-------------------|------------|---------|---------------|----------------------|
| 1                 | 2          | 3       | 4             | 5                    |
| Muy<br>deficiente | Deficiente | Pasable | Satisfactoria | Muy<br>satisfactoria |

**25. ¿Has recibido algún curso específico de lactancia materna durante los años de tu residencia? Sí / No**

**26. En caso afirmativo, indícanos el número de cursos que has recibido y su duración total aproximada:**

\_\_\_\_\_ cursos, \_\_\_\_\_ horas de duración.

**27. ¿Cual es tu mayor fuente de conocimiento en lactancia materna? (puedes marcar varias)**

- a) Cursos
- b) Libros / artículos
- c) Conocimientos de la carrera
- d) Mis residentes mayores (o adjuntos)
- e) Otros (especificar): \_\_\_\_\_

**28. ¿Crees que deberías ser un experto en diagnosticar y aportar soluciones a los problemas específicos de la lactancia? Sí / No**

**29. ¿Por qué? (puedes marcar varias)**

- a) Porque es un motivo de consulta frecuente
- b) Por el bien de mis pacientes y sus familias
- c) Porque es parte de mi trabajo
- d) Otros \_\_\_\_\_

**30. ¿Te sientes preparado para ello?**

|          |      |       |          |               |
|----------|------|-------|----------|---------------|
| 1        | 2    | 3     | 4        | 5             |
| En       | Poco | Más o | Bastante | Completamente |
| absoluto |      | menos |          |               |

**31. Comentarios:**
