# Supplementary material
Source: Elsevier journal article supplement (https://www.sciencedirect.com/science/article/pii/S2341287915001908)
Supplement: mmc2 [file S2341287915001908:mmc2.pdf]

## Check list de ítems correctos en la observación de la toma

|                         |                                                                                                                                                                                                                                                                                                                                                                                                                                                                                                                                                                                                                                   | ABREVIADO                                                                                                                                                                                                                                                                                                                                                   |
|-------------------------|-----------------------------------------------------------------------------------------------------------------------------------------------------------------------------------------------------------------------------------------------------------------------------------------------------------------------------------------------------------------------------------------------------------------------------------------------------------------------------------------------------------------------------------------------------------------------------------------------------------------------------------|-------------------------------------------------------------------------------------------------------------------------------------------------------------------------------------------------------------------------------------------------------------------------------------------------------------------------------------------------------------|
| Postura de madre y bebé | <p>Madre relajada y cómoda</p> <p>Bebé en estrecho contacto con su madre</p> <p>La madre refiere no tener dolor</p> <p>Cabeza y cuello alineados frente al pecho</p> <p>Cuerpo del lactante bien sujeto</p> <p>Bebé acercado al pecho con la nariz cerca del pezón</p> <p>Ombbligo del bebé en contacto con ombbligo/abdomen de la madre</p> <p>Cuello del bebé en ligera extensión</p> <p>Mentón tocando el pecho (o muy cerca)</p> <p>El pezón se acerca al labio superior (o debajo de la nariz)</p> <p>Forma del pezón redondeada y simétrica al acabar la toma</p> <p>Contacto visual madre-hijo, ojos del bebé abiertos</p> | <p>Madre relajada</p> <p>Contacto estrecho</p> <p>No dolor</p> <p>Cabeza y pecho alineados</p> <p>Lactante sujeto</p> <p>Nariz cerca del pecho</p> <p>Ombbligo con ombbligo</p> <p>Cuello en ligera extensión</p> <p>Mentón tocando el pecho</p> <p>Pezón en labio superior</p> <p>Pezón redondeado y simétrico al acabar</p> <p>Contacto visual</p>        |
| Lactante                | <p>Boca bien abierta</p> <p>Labios superior e inferior evertidos</p> <p>La lengua rodea pezón y areola</p> <p>Mejillas llenas y redondeadas (sin hoyuelos)</p> <p>Más areola visible por encima del labio superior que por debajo del inferior</p> <p>Gran parte de la areola dentro de la boca del bebé</p> <p>Movimientos de succión lentos y profundos</p> <p>Se ve y oye deglutir al bebé</p> <p>No se oyen chasquidos ni ruidos de chupeteo</p> <p>Movimientos rápidos de masticación, en los que se intercalan pausas</p> <p>Se mueven las orejas del bebé mientras mama</p>                                                | <p>Boca bien abierta</p> <p>Labios evertidos</p> <p>Lengua rodea pezón y areola</p> <p>Sin hoyuelos</p> <p>Más areola visible por arriba</p> <p>Mucha areola en la boca</p> <p>Succión lenta y profunda</p> <p>Se ve y oye deglutir</p> <p>No chasquidos ni chupeteos</p> <p>Movimientos de masticación rápidos, con pausas</p> <p>Se mueven las orejas</p> |
| Signos de transferencia | <p>Humedad alrededor de la boca del bebé</p> <p>El lactante relaja progresivamente brazos y piernas</p> <p>El pecho se ablanda progresivamente</p> <p>Sale leche por el otro pezón</p> <p>La madre siente signos de eyección (sed, relajación o somnolencia, contracciones uterinas)</p> <p>El lactante suelta espontáneamente el pecho al finalizar la toma</p> <p>El lactante queda satisfecho tras la toma</p>                                                                                                                                                                                                                 | <p>Asoma leche</p> <p>Se relaja progresivamente</p> <p>Pecho se ablanda</p> <p>Sale leche por el otro pezón</p> <p>Signos de eyección</p> <p>Suelta espontáneamente el pezón</p> <p>Al acabar, queda satisfecho</p>                                                                                                                                         |
|                         |                                                                                                                                                                                                                                                                                                                                                                                                                                                                                                                                                                                                                                   | OTRO CORRECTO                                                                                                                                                                                                                                                                                                                                               |
