# Supplementary material
Source: Elsevier journal article supplement (https://www.sciencedirect.com/science/article/pii/S2341287915001908)
Supplement: mmc3 [file S2341287915001908:mmc3.pdf]

## **Jueces y colaboradores (por orden alfabético):**

### **1. Dra. Josefa Aguayo Maldonado**

Pediatra. Jefa de servicio Neonatología Hospital Virgen del Rocío (Sevilla). Miembro del Comité de Lactancia (1999-2013)

### **2. Dra. Susana Ares Segura**

Pediatra. Hospital Universitario La Paz (Madrid). Miembro del Comité de Lactancia Materna de la AEP (2009-actualidad)

### **3. Dra. Marta Costa Romero**

Pediatra. Hospital Universitario Central Asturias (Oviedo). Miembro del Comité Lactancia Materna AEP (2013-actualidad)

### **4. Dra. Marta Díaz Gómez**

Pediatra. Profesora Titular Universidad de La Laguna. Miembro del Comité de Lactancia Materna de la AEP (1995-actualidad), actualmente Coordinadora del Comité de LM.

### **5. Dra. Blanca Espínola Docío**

Pediatra. CS Luis Vives, Alcalá de Henares (Madrid). Miembro del Comité de Lactancia Materna de la AEP (2013-actualidad)

### **6. Dra. Beatriz Flores Antón**

Pediatra. Hospital Universitario 12 de Octubre (Madrid). Miembro del Comité de Lactancia Materna de la AEP (2013-actualidad).

### **7. Dra. Ana Gimeno Navarro**

Pediatra. Hospital Universitario y Politécnico La Fe Valencia. Miembro del Comité de Lactancia Materna de la AEP (2013-actualidad)

### **8. Dr. Adolfo Gómez Papí**

Pediatra. Hospital Joan XXIII (Tarragona). Miembro del Comité de Lactancia Materna de la AEP (2000-2013)

### **9. Dra. María Teresa Hernández Aguilar**

Pediatra. Unidad de Lactancia departamental Valencia - Dr.Peset. Miembro del Comité Lactancia Materna de la AEP (1999-2013)

### **10. Dra. Ana Jiménez Moya**

Pediatra. Hospital Punta de Europa, Algeciras. Miembro del Comité de Lactancia Materna de la AEP (2009-2013)

**11. Dra. Paula Lalaguna Mallada**

Pediatra. Hospital de Barbastro (Huesca), hospital IHAN. Miembro del Comité de Lactancia Materna de la AEP (2013-actualidad)

**12. Dr. Juan José Lasarte Velillas**

Pediatra. Centro de salud de Torre Ramona. Zaragoza. Miembro del Comité de Lactancia Materna de la AEP (1997-2013).

**13. Dr. Jesús Martín-Calama Valero**

Pediatra. Jefe del Servicio de Pediatría del Hospital Obispo Polanco (Teruel). Miembro del Comité de Lactancia Materna de la AEP (1995-actualidad).

**14. Dr. Jose Manuel Martín Morales**

Pediatra. Hospital da Barbanza. Ribeira (A Coruña). Miembro del Comité de Lactancia Materna de la AEP (2002-actualidad).

**15. Dra. Carmen Rosa Pallás Alonso**

Pediatra. Jefa de servicio Unidad Neonatal, Hospital Universitario Doce de Octubre, Madrid. (Hospital IHAN). Miembro del Comité de Lactancia Materna de la AEP (2002-2013)

**16. Dr. Jose María Paricio Talayero**

Pediatra. Hospital de Alcoi (Alicante). Miembro del Comité de Lactancia Materna de la AEP (1999-2013).

**17. Dra. Laura Sanfeliciano Martín**

Pediatra. Hospital Universitario de Salamanca. Miembro Comité de Lactancia materna de la AEP (2013-actualidad)
